# Supplementary material for: Large-Scale Biomedical Relation Extraction Across Diverse Relation Types: Model Development and Usability Study on COVID-19
Source: J Med Internet Res. 2023 Sep 20;25:e48115. doi: 10.2196/48115 (PMC10551783; doi:10.2196/48115)
Supplement: Multimedia Appendix 2 [file jmir_v25i1e48115_app2.docx]

**Multimedia** **Appendix 2.** Formulae used in the study.

The formulae of evaluation metrics were presented below, for 125 relation types: *, ……, , ……,* ,

the precision of relation type is defined as:

the recall of relation type is defined as:

the F1 score of relation type is defined as:

The calculation of Adamic Adar scores is presented below:

where is the set of nodes adjacent to .
